# Supplementary material for: Assessment of Risk of Harm Associated With Intensive Blood Pressure Management Among Patients With Hypertension Who Smoke: A Secondary Analysis of the Systolic Blood Pressure Intervention Trial
Source: PubMed Central journal article supplement (PMC6484649; doi:10.1001/jamanetworkopen.2019.0005), 2019-03-08
Supplement: jamanetwopen-2-e190005-s001.pdf [file jamanetwopen-2-e190005-s001.pdf]

## Supplementary Online Content

Scarpa J, Bruzelius E, Doupe P, Le M, Faghmous J, Baum, A. Assessment of risk of harm associated with intensive blood pressure management among patients with hypertension who smoke: a secondary analysis of the Systolic Blood Pressure Intervention Trial. *JAMA Network Open*. 2019;2(2):e190005. doi:10.1001/jamanetworkopen.2019.0005

**eAppendix.** Details on Underlying Functioning of Causal Forest Method

**eTable 1.** Twenty-Seven Baseline Predictors

**eTable 2.** Covariates That Most Frequently Defined the 6% of Subgroups (Leaves) Identified in the Training Data as Having a Higher Likelihood of Being Adversely Affected by Treatment

**eTable 3.** Observed Outcomes by Treatment Group Using Testing Data for Current Smokers, Participants With Baseline Systolic Blood Pressure (SBP) > 144 mmHg, and their Interaction

**eTable 4.** Observed Serious Adverse Event Outcomes by Treatment Group Using Testing Data, for the Subgroup Identified Using Training Data

**eTable 5.** Observed Outcomes by Treatment Group Using Testing Data for Subgroups Defined by a Baseline Glucose in the Bottom Quartile (<91 mg/dl), Urine Albumin/Creatinine Ratio in the Bottom Half (<9.5 mg/g Cr) of the Distribution, and Their Interaction

**eFigure 1.** Blood Pressure Changes Across Treatment Group for Hypertensive Smokers vs. Remaining Participations

**eFigure 2.** Distributions of P-values and False Discovery Rates Across Subgroups Identified by the Causal Forest

**eReferences.**

This supplementary material has been provided by the authors to give readers additional information about their work.

## **eAppendix: Details on Underlying Functioning of Causal Forest Method**

### *Overview*

This paper applies recent advances in machine learning for causal inference to conduct a post-hoc analysis of a randomized controlled trial (RCT). The Systolic Blood Pressure Intervention Trial (SPRINT) clinical trial we focus on demonstrated that treatment to a lower systolic blood pressure target (<120 mmHg) in non-diabetic adults provides increased benefit over a more modest target (<140mmHg)(1). However, we hypothesized that the positive average treatment effect may mask clinically- and policy-relevant heterogeneity.

Causally interpreting post-hoc analyses of RCTs is challenging because investigators may test a large number hypotheses, but only report those with significant treatment effects. On the other hand, the small set of pre-specified hypotheses registered ex-ante by investigators may leave clinically useful relationships between interventions, outcomes, and subgroups undiscovered. Recognizing the limitations of conventional approaches to subgroup analyses, and the fact that many clinical trials will be underpowered to detect meaningful treatment variation, a number of newer approaches to identifying heterogeneous treatment effect (HTEs) have been proposed.(2) These include a class of more data-driven predictive risk modeling tools such as Classification and Regression Trees which are typically most appropriate for early exploratory analyses.

The post-hoc analysis method we employ, called causal forest, extends classical recursive partitioning methods (e.g. random forest) to identify causally relevant subgroups defined by interactions of many variables, a combinatorial task for which human intuition and expertise is poorly suited. The initial, and conceptually important, step is to randomly split the data into two

independent halves, using the first partition for hypothesis generation/tree construction (training data) and preserving the remainder of the data for statistically valid inference (testing data). The method first identifies subgroups with similar treatment effects in the training data, then tests the most promising HTE hypotheses on the testing data to mitigate multiple testing concerns.

### ***Partitioning the data***

The SPRINT data (n=9,361) was randomly divided into two equal subsets: a training set for machine learning-based hypothesis generation and a testing set for statistical inference-based hypothesis testing. To ensure the training data was reflective of the whole data set, we constrained the split to guarantee the average treatment effect in the training data was within 1% of the originally reported overall hazard ratio for the primary outcome and covariate distributional balance, both across the training and testing data and between treated and control groups within each partition, using entropy weight minimization. Specifically, to select an optimal split, one thousand different random divisions of the full data were analyzed. To evaluate if the training data was reflective of the whole data set, the Cox proportional hazards regression was used to calculate the hazard ratio in the training data of each split. Splits with a training data hazard ratio +/- 1% of the originally reported hazard ratio (0.75) were further evaluated. For these splits, entropy weights were calculated to estimate the covariate balance between the training and testing data. The covariate distribution across treatment and control groups within the training data and the testing data, respectively, was also evaluated. For each split, the variance was calculated for these three weight vectors: the first compares the balance of covariates between the candidate training and testing data, the second compares the balance of covariates between the treatment groups of the candidate training and testing data, and the last

compares the covariate balance between the control groups. Each split was assigned three ranks, based on the variance of each weight vector. A composite rank was calculated for each data split by minimizing the variance of three weight vectors. and the optimal split was determined to be the one with the lowest composite rank. The final training data had 4,681 participants and the final testing data had 4,680 participants.

### ***Identification of subgroups using the training data***

To identify subgroups, we constructed an ensemble of causal trees(3), a type of decision tree. Decision trees are especially well-suited for identifying subgroups because they produce a partition of the sample in which subgroups share similar predictions or classifications that is not limited by model specification assumptions (as compared to several other approaches, e.g. (4) and (5)).In each causal tree, half the sample is randomly selected and its covariate space is sequentially partitioned into subspaces. Each split minimizes variation in the mean squared error of the estimated average treatment effect within each subspace. Because the structure of a single tree depends on the training data, different training data may yield vastly different trees. To account for the high variance in any given tree, an ensemble of trees (a “forest”) is often used. In this study, we constructed a forest of 1,000 trees.

Trees with an overall treatment effect within 1 median absolute deviation of the ensemble (“forest”) were prioritized for downstream analysis since they are likely the most robust and reproducible. To investigate subgroups with higher likelihood of being adversely affected by treatment, we identified all leaves with a positive average treatment effect, suggesting that the

subgroup<sup>1</sup> of patients in the leaf may have had higher mortality due to treatment. Six percent of all leaves met this criterion and were considered high-priority subgroup hypotheses to investigate in the testing data.

### ***Estimating HTE using the testing data***

For these subgroup hypotheses, a Cox proportional hazards regression was used to estimate the significance of the hazard ratio for the primary outcome, with stratification according to clinic site. Following standardized protocols for detection of HTEs, the Cox models contain terms for study-group assignment, a subgroup dummy variable, and their interaction. To account for multiple hypothesis testing, we randomly permuted the subgroup assignment in the test data 1,000 times. For each permutation, the cox model was calculated with treatment, subgroup, and their interaction as independent covariates, stratified by clinic site, as employed in the original test data. The false discovery rate (FDR) was estimated by calculating the proportion of the permuted interaction coefficients that were greater than true interaction coefficient. A subgroup was considered adversely affected only if (i) the hazard ratio for the interaction between the treatment and the subgroup was greater than 1 and significant ( $p < 0.05$  and the false discovery rate (FDR)  $< 0.05$ ) and (ii) the hazard ratio for the subgroup was greater than 1 and significant ( $p < 0.05$ )

<sup>1</sup> Subgroups (leaves) were defined by covariate values exclusive of the split points, e.g.  $\leq 6$  was tested as  $< 6$ .

**eTable 1.** Twenty-Seven Baseline Predictors

| Variable     | Label                                                | Source                                                    | Value                                           | Description                                                                                                                                                  |
|--------------|------------------------------------------------------|-----------------------------------------------------------|-------------------------------------------------|--------------------------------------------------------------------------------------------------------------------------------------------------------------|
| risk10 yrs   | Derived: Framingham estimation of 10-year CVD risk   | Inclusion/Exclusion Summary; Central Laboratory (no form) | numeric value                                   | Computed 10-year risk of CVD based on Framingham risk equation                                                                                               |
| InclusionFRS | Derived: Framingham 10-year CVD risk >15%            | Inclusion/Exclusion Summary; Central Laboratory (no form) | 0 - No; 1 - Yes                                 | 0/1 indicator whether 10-year Framingham risk score is >15%                                                                                                  |
| sbp          | Derived: Seated Systolic Blood Pressure (mm Hg)      | BP Mangement Baseline; Inclusion/Exclusion                | numeric value                                   | Seated SBP from Baseline BP Management Form or Inclusion/Exclusion Summary if missing on BP Management                                                       |
| dbp          | Derived: Seated Diastolic Blood Pressure (mm Hg)     | BP Mangement Baseline; Inclusion/Exclusion                | numeric value                                   | Seated DBP from Baseline BP Management Form or Inclusion/Exclusion Summary if missing on BP Management                                                       |
| n_agents     | Derived: Number of medications prescribed            | Blood Pressure Medication Management Log                  | numeric value                                   | Number of distinct anti-hypertensive agents prescribed at baseline visit (prior to randomization)                                                            |
| noagents     | Derived: Participants on no anti-hypertensive agents | Blood Pressure Medication Management Log                  | 0 - one or more agents; 1 - on no agents        | 0/1 indicator whether participant on NO anti-hypertensives at baseline visit (prior to randomization)                                                        |
| smoke_3cat   | Derived: Baseline smoking status                     | Self-Administered Baseline History                        | 1 - Never; 2 - Former; 3 - Current; 4 - Missing | categorization of smoking status from Tobacco Questionnaire (questions 51-53) on Self-administered Baseline History                                          |
| aspirin      | BSL Hist: Daily Aspirin Use                          | Self-Administered Baseline History                        | 0 - No; 1 - Yes                                 | question 56 on Self-administered Baseline History                                                                                                            |
| egfr         | Lab: eGFR MDRD (mL/min/1.73m <sup>2</sup> )          | Central Laboratory (no form)                              | numeric value                                   | estimated glomerular filtration rate (eGFR) from baseline blood draw                                                                                         |
| screat       | Lab: serum creatinine, mg/dL                         | Central Laboratory (no form)                              | numeric value                                   | serum creatinine from baseline blood draw                                                                                                                    |
| sub_ckd      | Derived: Subgroup with CKD (eGFR<60)                 | Central Laboratory (no form)                              | 0 - No; 1 - Yes                                 | participants with baseline eGFR <60 mL/min/1.73m <sup>2</sup> assigned value of "1"; all others (including those missing baseline eGFR assigned value of "0" |
| race_black   | Incl/Excl: Black, African-American                   | Inclusion/Exclusion Summary                               | 0 - No; 1 - Yes                                 | 0/1 indicator of African American race by self-report                                                                                                        |
| age          | Derived: Age at randomization top-coded at 90 years  | Inclusion/Exclusion Summary                               | numeric value                                   | calculated from date of birth on Inclusion/Exclusion summary and top-coded at 90 years                                                                       |

|                    |                                                            |                                             |                                            |                                                                                                                                                                                                                                                                                     |
|--------------------|------------------------------------------------------------|---------------------------------------------|--------------------------------------------|-------------------------------------------------------------------------------------------------------------------------------------------------------------------------------------------------------------------------------------------------------------------------------------|
| female             | Derived: Age at randomization top-coded at 90 years        | Inclusion/Exclusion Summary                 | 0 - Male; 1 - Female                       | 0/1 indicator of female gender                                                                                                                                                                                                                                                      |
| sub_cvd            | Derived: subgroup with history of clinical/subclinical CVD | Inclusion/Exclusion Summary                 | 0 - No; 1 - Yes                            | 0/1 indicator of history of one or more of MI, ACS, coronary revascularization, carotid revascularization, PAD with revascularization, >50% stenosis of coronary/carotid/lower extremity artery; AAA $\geq$ 5 mm, coronary artery calcium score $\geq$ 400, ABI $\leq$ 0.90, or LVH |
| sub_clincalcvd     | Derived: subgroup with history of clinical CVD             | Inclusion/Exclusion Summary                 | 0 - No; 1 - Yes                            | 0/1 indicator of history of one or more of MI, ACS, coronary revascularization, carotid revascularization, PAD with revascularization, >50% stenosis of coronary/carotid/lower extremity artery; or AAA $\geq$ 5 mm,                                                                |
| sub_subclinicalcvd | Derived: subgroup with history of subclinical CVD          | Inclusion/Exclusion Summary                 | 0 - No; 1 - Yes                            | 0/1 indicator of history of one or more of coronary artery calcium score $\geq$ 400, ABI $\leq$ 0.90, or LVH                                                                                                                                                                        |
| sub_senior         | Derived: subgroup $\geq$ 75 years old at randomization     | Inclusion/Exclusion Summary                 | 0 - No; 1 - Yes                            | 0/1 indicator of age $\geq$ 75 at randomization                                                                                                                                                                                                                                     |
| race4              | Derived: Four-level race variable (character)              | Inclusion/Exclusion Summary                 | HISPANIC, BLACK, WHITE, OTHER              | self-reported race/ethnicity, if Hispanic ethnicity then value is "HISPANIC" all other values are non-Hispanic                                                                                                                                                                      |
| CHR                | Lab: Cholesterol, mg/dL                                    | Central Laboratory (no form)                | numeric value                              | total cholesterol from baseline blood draw                                                                                                                                                                                                                                          |
| GLUR               | Lab: Glucose, mg/dL                                        | Central Laboratory (no form)                | numeric value                              | serum glucose from baseline blood draw                                                                                                                                                                                                                                              |
| HDL                | Lab: HDL-cholesterol direct, mg/dL                         | Central Laboratory (no form)                | numeric value                              | HDL-cholesterol from baseline blood draw                                                                                                                                                                                                                                            |
| TRR                | Lab: Triglycerides, mg/dL                                  | Central Laboratory (no form)                | numeric value                              | Triglycerides from baseline blood draw                                                                                                                                                                                                                                              |
| UMA LCR            | Lab: mg Urine Alb / (g Creat * 0.01), mg/g Cr              | Central Laboratory (no form)                | numeric value                              | urine albumin/creatinine ratio from baseline sample, measured values <2 mg/g coded as missing                                                                                                                                                                                       |
| BMI                | Derived: body mass index (kg/m <sup>2</sup> )              | Baseline Medications and Physical Exam      | numeric value                              | body mass index (kg/m <sup>2</sup> ) calculated from recorded weight and height                                                                                                                                                                                                     |
| statin             | Derived: on any statin                                     | Baseline Medications and Physical Exam      | 0 - No; 1 - Yes                            | 0/1 indicator based on concomitant medications reported at baseline                                                                                                                                                                                                                 |
| SBPTertile         | Derived: Systolic BP tertile                               | BP Management Baseline; Inclusion/Exclusion | 1: $\leq$ 144; 2: >144-<145; 3: $\geq$ 145 | baseline SBP divided into three groups based on tertiles (equal thirds) of the empirical distribution                                                                                                                                                                               |

**eTable 2.** Covariates That Most Frequently Defined the 6% of Subgroups (Leaves) Identified in the Training Data as Having a Higher Likelihood of Being Adversely Affected by Treatment

| <b>Covariate</b>                          | <b>Frequency</b> |
|-------------------------------------------|------------------|
| Framingham estimation of 10-year CVD risk | 67               |
| Cholesterol (mg/dL)                       | 66               |
| mg Urine Alb / (g Creat * 0.01), mg/g Cr  | 63               |
| Baseline smoking status                   | 54               |
| Serum creatinine (mg/dL)                  | 40               |
| Diastolic Blood Pressure (mm Hg)          | 34               |
| Body mass index (kg/m <sup>2</sup> )      | 33               |
| eGFR MDRD (mL/min/1.73m <sup>2</sup> )    | 33               |
| HDL-cholesterol direct (mg/dL)            | 28               |
| Systolic Blood Pressure (mm Hg)           | 27               |
| Systolic Blood Pressure Percentile        | 27               |
| Glucose(mg/dL)                            | 26               |
| Triglycerides (mg/dL)                     | 25               |
| Race (HISPANIC, BLACK, WHITE, OTHER)      | 21               |
| Female                                    | 16               |
| ≥75 years old at randomization            | 13               |
| Daily Aspirin Use                         | 9                |
| On any statin                             | 9                |
| History of clinical/subclinical CVD       | 3                |



**eTable 3.** Observed Outcomes by Treatment Group Using Testing Data for Current Smokers, Participants With Baseline Systolic Blood Pressure (SBP) > 144 mmHg, and their Interaction

| <i>Panel A. Results of Subgroup Models</i>          | <b>Hazard Ratio on Treatment</b>        |                |
|-----------------------------------------------------|-----------------------------------------|----------------|
|                                                     | <b>HR [95% CI]</b>                      | <b>P value</b> |
| <b>Subgroup</b>                                     |                                         |                |
| <i>Current Smokers</i>                              | 1.65 [0.84-3.26]                        | 0.148          |
| <i>SBP greater &gt; 144 mmHg</i>                    | 0.75 [0.51-1.10]                        | 0.144          |
| <i>Current smokers with SBP &gt; 144 mmHg</i>       | 10.56 [1.29-86.13]                      | 0.028          |
| <i>Panel B. Results of Interaction Models</i>       | <b>Hazard Ratio on Interaction Term</b> |                |
|                                                     | <b>HR [95% CI]</b>                      | <b>P value</b> |
| <b>2-Way Interaction Model: Current Smoker</b>      |                                         |                |
| <i>Current Smoker × Treatment</i>                   | 2.18 [1.12-4.21]                        | 0.021          |
| <b>2-Way Interaction Model: SBP&gt;144mmHg</b>      |                                         |                |
| <i>SBP&gt;144 mmHg × Treatment</i>                  | 0.91 [0.56-1.48]                        | 0.702          |
| <b>3-Way Interaction Model</b>                      |                                         |                |
| <i>Current Smoker × Treatment</i>                   | 1.14 [0.65-1.99]                        | 0.654          |
| <i>SBP&gt;144 mmHg × Treatment</i>                  | 0.83 [0.55-1.24]                        | 0.353          |
| <i>Current Smoker × SBP&gt;144 mmHg × Treatment</i> | 1.99 [1.07-3.71]                        | 0.030          |

**eTable 4.** Observed Serious Adverse Event Outcomes by Treatment Group Using Testing Data, for the Subgroup Identified Using Training Data

| Serious Adverse Event                           | No. patients in Subgroup (No. of events) |          | Hazard Ratio      |         |
|-------------------------------------------------|------------------------------------------|----------|-------------------|---------|
|                                                 | Treated                                  | Control  | HR [95% CI]       | P value |
| AKI or ARF ER Visit or SAE event                | 110 (11)                                 | 126 (4)  | 9.44 [1.15-77.29] | p=0.036 |
| Hypotension ER Visit or SAE event               | 110 (7)                                  | 126 (3)  | 7.13 [0.75-67.8]  | p=0.087 |
| Syncope ER Visit or SAE event                   | 110 (7)                                  | 126 (4)  | 4.06 [0.44-37.67] | p=0.218 |
| Electrolyte abnormality ER Visit or SAE event   | 110 (8)                                  | 126 (4)  | 3.55 [0.69-18.22] | p=0.128 |
| Injurious fall ER Visit or SAE event            | 110 (6)                                  | 126 (5)  | 1.59 [0.36-7.11]  | p=0.540 |
| Orthostatic Hypotension with dizziness event    | 110 (2)                                  | 126 (4)  | 0.39 [0.03-4.44]  | p=0.447 |
| Orthostatic Hypotension event without dizziness | 110 (11)                                 | 126 (34) | 0.22 [0.06-0.75]  | p=0.022 |

**eTable 5.** Observed Outcomes by Treatment Group Using Testing Data for Subgroups Defined by a Baseline Glucose in the Bottom Quartile (<91 mg/dl), Urine Albumin/Creatinine Ratio in the Bottom Half (<9.5 mg/g Cr) of the Distribution, and Their Interaction

| <i>Panel A. Results of Subgroup Models</i>                                                        | <b>Hazard Ratio on Treatment</b>        |                |
|---------------------------------------------------------------------------------------------------|-----------------------------------------|----------------|
|                                                                                                   | <b>HR [95% CI]</b>                      | <b>P value</b> |
| <b>Subgroup</b>                                                                                   |                                         |                |
| <i>Glucose in the bottom quartile</i>                                                             | 1.11 [0.67-1.82]                        | 0.698          |
| <i>Urine albumin/creatinine ratio in bottom half</i>                                              | 0.54 [0.35-0.83]                        | 0.005          |
| <i>Glucose in the bottom quartile &amp; Urine albumin/creatinine ratio in bottom half</i>         | 3.17 [0.96-10.42]                       | 0.058          |
| <i>Panel B. Results of Interaction Models</i>                                                     | <b>Hazard Ratio on Interaction Term</b> |                |
|                                                                                                   | <b>HR [95% CI]</b>                      | <b>P value</b> |
| <b>2-Way Interaction Model: Glucose</b>                                                           |                                         |                |
| <i>Glucose in the bottom quartile × Treatment</i>                                                 | 1.77 [1.02-3.06]                        | 0.043          |
| <b>2-Way Interaction Model: Urine albumin/creatinine ratio</b>                                    |                                         |                |
| <i>Urine albumin/creatinine ratio in bottom half × Treatment</i>                                  | 0.61 [0.36-1.01]                        | 0.054          |
| <b>3-Way Interaction Model</b>                                                                    |                                         |                |
| <i>Glucose in the bottom quartile × Treatment</i>                                                 | 1.05 [0.54-2.03]                        | 0.884          |
| <i>Urine albumin/creatinine ratio in bottom half × Treatment</i>                                  | 0.42 [0.23-0.77]                        | 0.005          |
| <i>Glucose in the bottom quartile × Urine albumin/creatinine ratio in bottom half × Treatment</i> | 5.66 [1.58-20.22]                       | 0.008          |

# eFigure 1. Blood Pressure Changes Across Treatment Group for Hypertensive Smokers vs. Remaining Participations

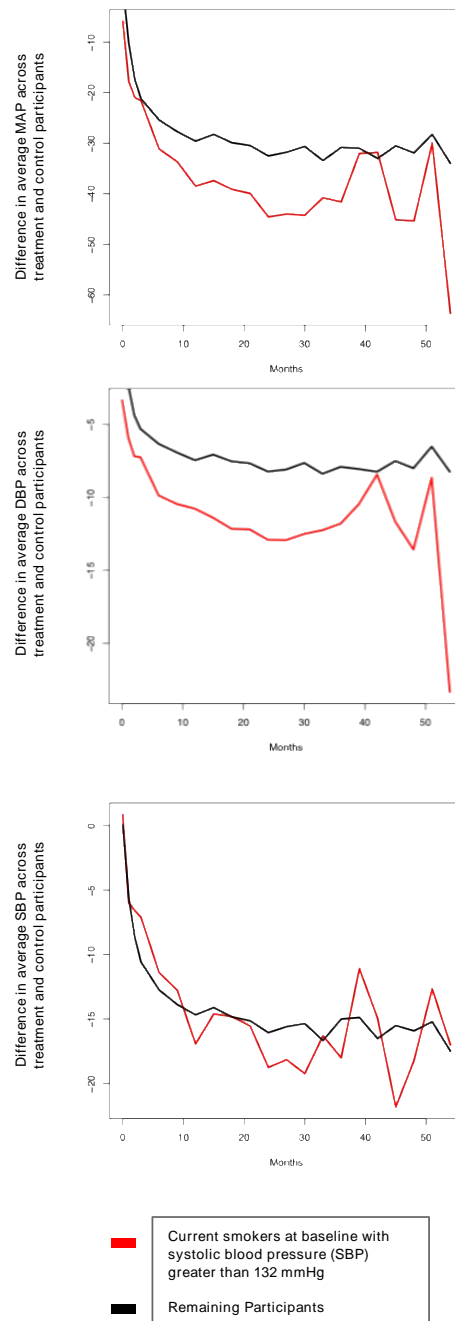

These plots show the difference across treatment and control participants in average blood pressure measurements Mean Arterial Pressure (MAP), Diastolic Blood Pressure (DBP), and

Systolic Blood Pressure (SBP)), respectively, over time for the baseline hypertensive smoker subgroup vs. remaining participants.

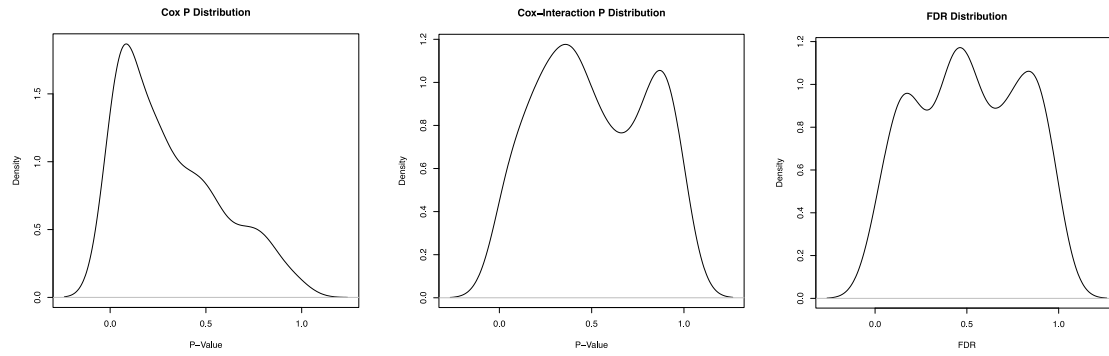

**Figure 2. Distributions of P-values and False Discovery Rates Across Subgroups Identified by the Causal Forest**

*Left:* Distribution of treatment term p-values across subgroups identified by the forest. *Middle:* Distribution of interaction term p-values across subgroups identified by the forest. *Right:* Distribution of FDRs across subgroups identified by the forest.

## **eReferences**

1. Group SR. A randomized trial of intensive versus standard blood-pressure control. *N Engl J Med.* 2015;2015(373):2103-16.
2. Willke RJ, Zheng Z, Subedi P, Althin R, Mullins CD. From concepts, theory, and evidence of heterogeneity of treatment effects to methodological approaches: a primer. *BMC Med Res Methodol.* 2012;12:185.
3. Athey S, Imbens G. Recursive partitioning for heterogeneous causal effects. *Proc Natl Acad Sci U S A.* 2016;113(27):7353-60.
4. Breiman L, Friedman J, Stone CJ, RA O. *Classification and regression trees.* Boca Raton, FL: CRC press; 1984.
5. Breiman L. Random forests. *Machine Learning.* 2001;45(1):5-32.
